# Supplementary material for: Structural changes in HfSe2and ZrSe2thin films with various oxidation methods
Source: Royal Society of Chemistry journal article supplement (doi:10.1039/d3tc04698b), 2024-01-01
Supplement: d3tc04698b1.pdf [file d3tc04698b1.pdf]

## Supporting Information

### Structural changes in HfSe<sub>2</sub> and ZrSe<sub>2</sub> thin films with various oxidation methods

Alexandre C. Foucher<sup>1</sup>, Wouter Mortelmans,<sup>1</sup> Bing Wu,<sup>2</sup> Zdenek Sofer,<sup>2</sup> Rafael Jaramillo<sup>1</sup>, Frances M. Ross<sup>1,\*</sup>

<sup>1</sup> Department of Materials Science and Engineering, Massachusetts Institute of Technology, Cambridge, Massachusetts 02139, United States

<sup>2</sup> Department of Inorganic Chemistry, University of Chemistry and Technology Prague, Technická 5, 166 28 Prague 6, Czech Republic

\*Corresponding author: fmross@mit.edu

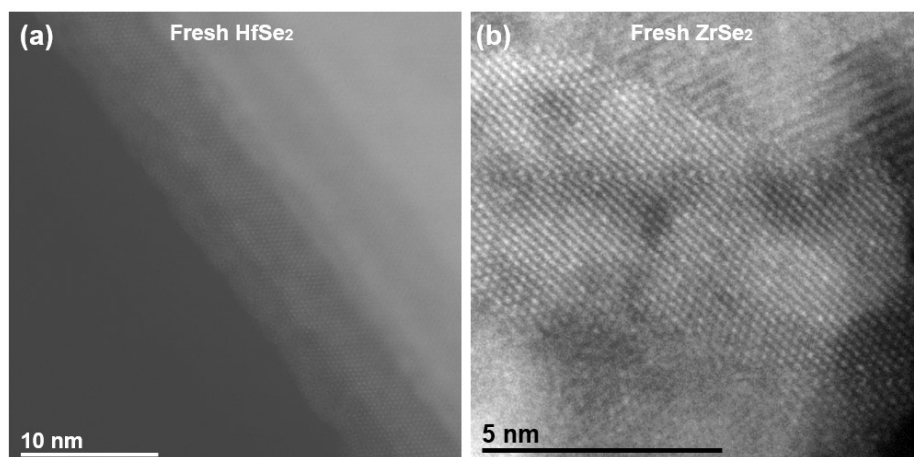

**Figure S1.** STEM images of freshly exfoliated samples to show other regions of (a) HfSe<sub>2</sub>; (b) ZrSe<sub>2</sub>.

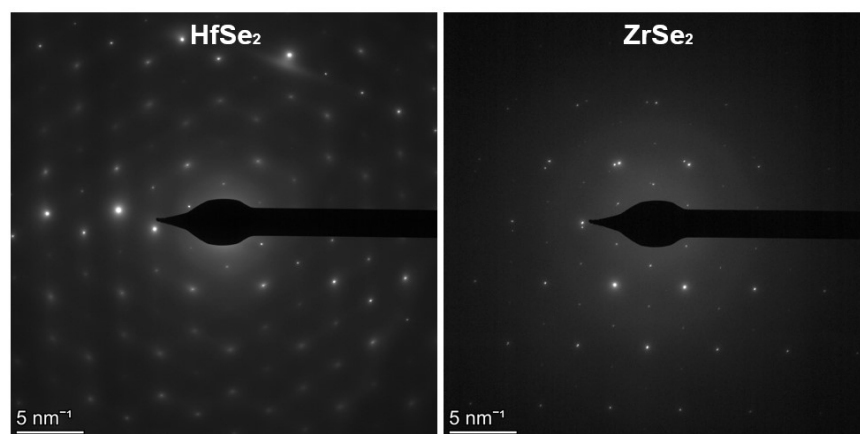

**Figure S2.** Diffraction pattern along [001] zone axis, perpendicular to the surface of the flakes. The sample was slightly tilted in HfSe<sub>2</sub>. For ZrSe<sub>2</sub>, there were two overlapping crystals, explaining the double spots. The diffraction patterns are consistent with symmetries found in  $P\bar{3}m1$ .

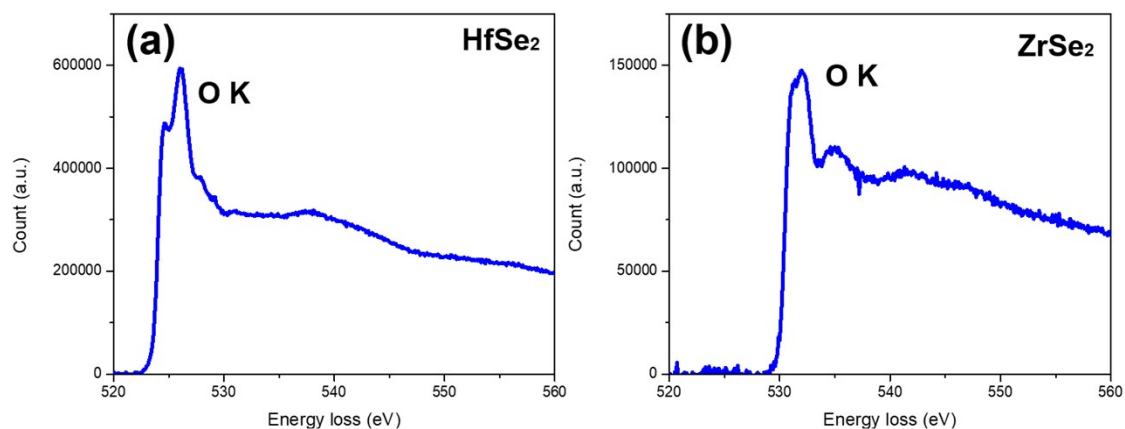

**Figure S3.** EELS data of the O K edge for the two materials after oxidation in air at room temperature. The shape of the edge is consistent with an oxidation state of +IV for both metals. (a) HfSe<sub>2</sub>. (b) ZrSe<sub>2</sub>.

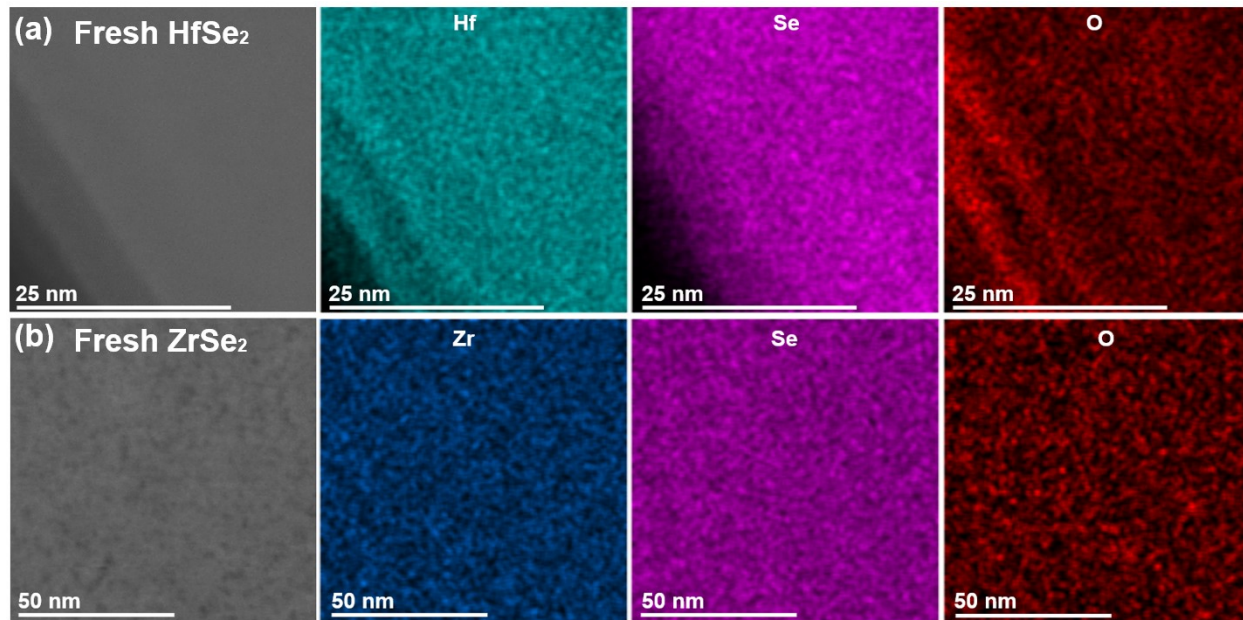

**Figure S4.** EDS analysis of freshly exfoliated (a) HfSe<sub>2</sub> and (b) ZrSe<sub>2</sub>. No segregation of Se is visible in the fresh samples.

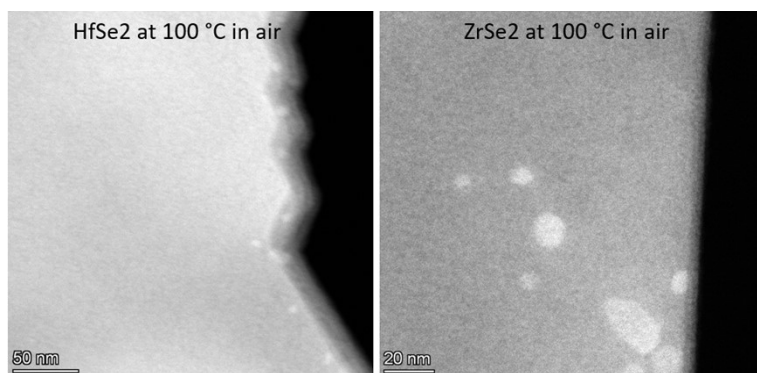

**Figure S5.** Flakes after oxidation in air at 100 °C for 20 minutes. Segregation of Se was observed, as for flakes oxidized in air at room temperature.

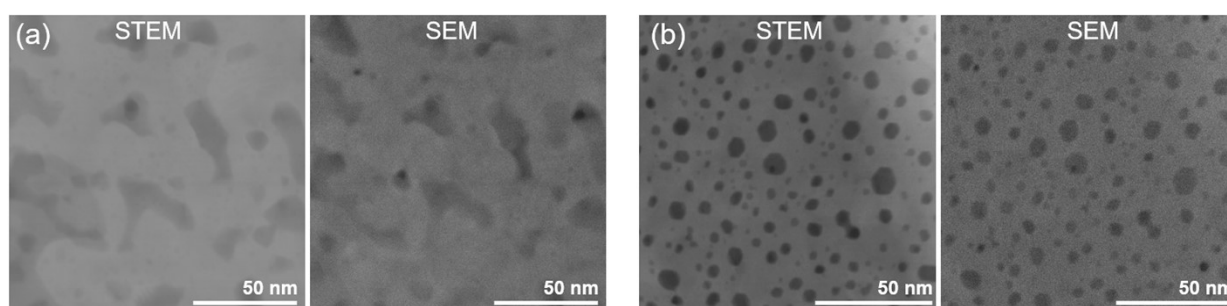

**Figure S6.** Simultaneously acquired STEM and SEM images showing pits at the surface of (a) HfSe<sub>2</sub> and (b) ZrSe<sub>2</sub> after heating. Many cavities appear to be at the surface.

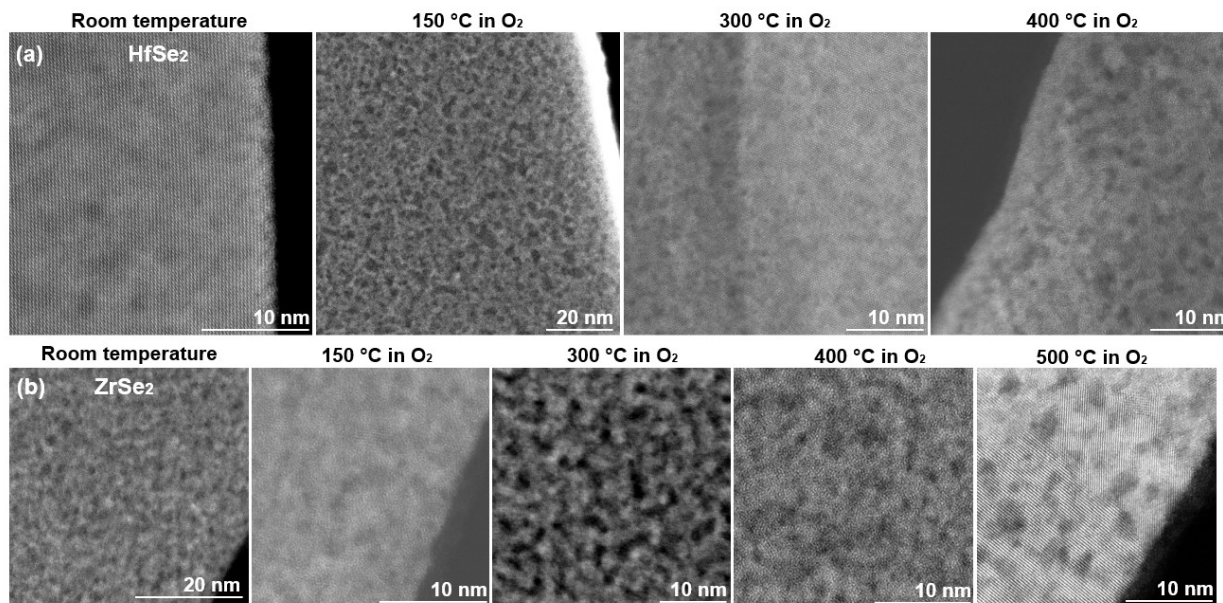

**Figure S7.** Heating of (a) HfSe<sub>2</sub> flake and (b) ZrSe<sub>2</sub> flake with *in situ* STEM at 10 Pa of O<sub>2</sub>. Defects can be seen at the indicated temperature, showing that thermal oxidation is not an ideal method.

**(a) HfSe<sub>2</sub> oxidized at 300 °C for 5 min**

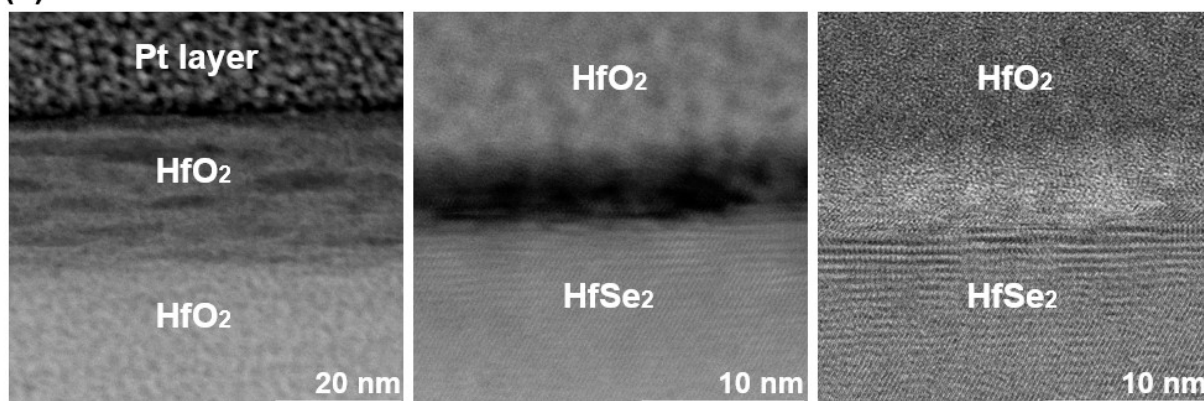

**(b) ZrSe<sub>2</sub> oxidized at 300 °C for 5 min**

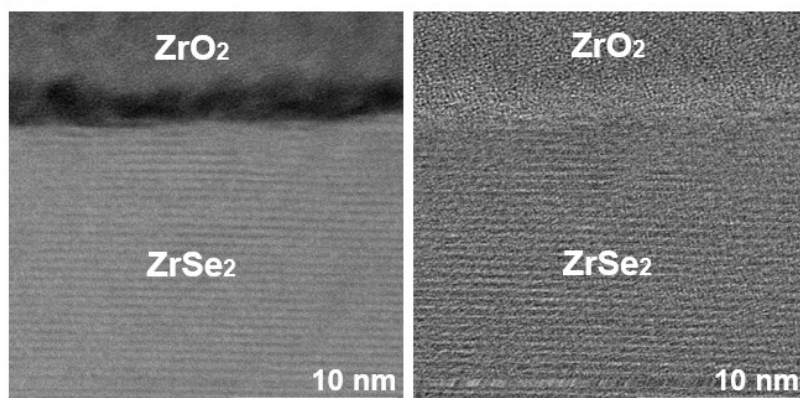

**Figure S8.** Cross-sections of samples heated in air (1bar) at 300 °C in a furnace for 5 minutes. (a) HfSe<sub>2</sub> oxidized into HfO<sub>2</sub>, with defects in HfO<sub>2</sub> and delamination between the oxide and HfSe<sub>2</sub>. (b) Delamination of the ZrO<sub>2</sub> layer on top of ZrSe<sub>2</sub>. The results underline that thermal oxidation at 1 bar is not an efficient method.



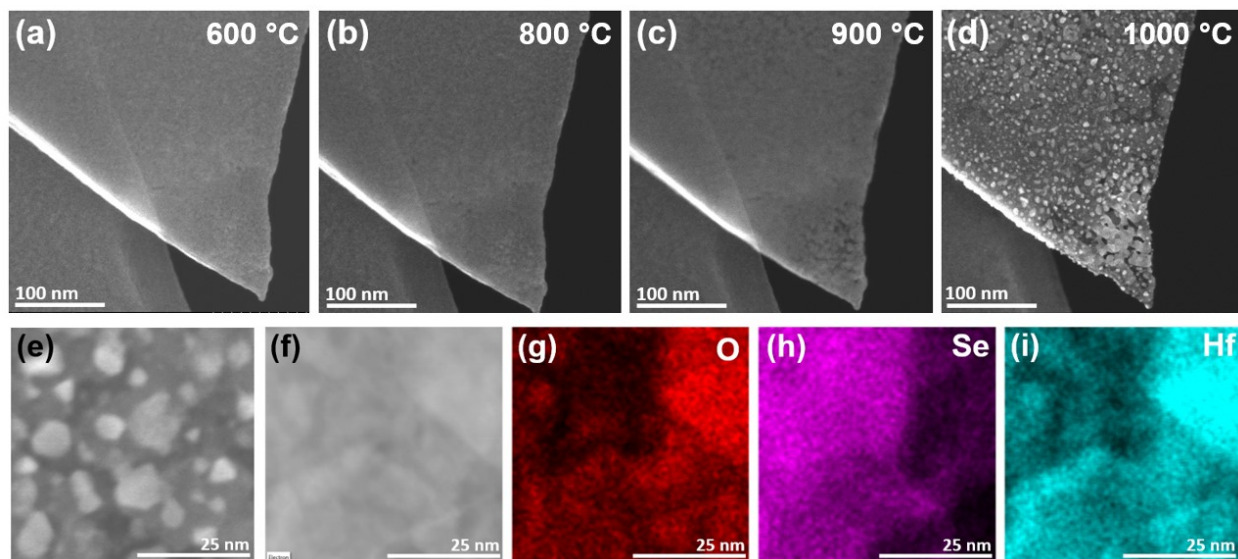

**Figure S9.** Structural changes on heating under vacuum of an HfSe<sub>2</sub> flake. (a-d) SEM images showing HfSe<sub>2</sub> flake after heating to the temperatures indicated. Islands are visible at temperatures above 900 °C. (e) SEM image showing islands on the surface after the sample was cooled down in vacuum. (f) Corresponding HAADF-STEM image. (g-i) Corresponding EDS maps for O, Se and Hf showing that the sample remains oxidized even after annealing in vacuum at 1000 °C.

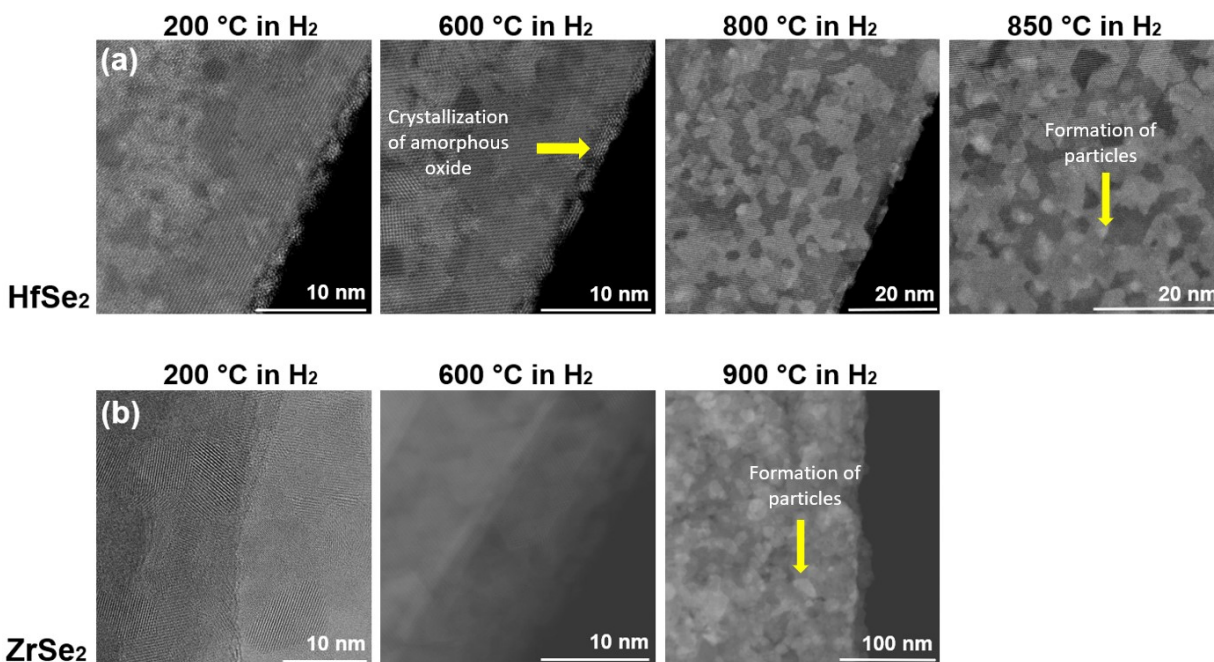

**Figure S10.** Progressive reduction of the materials showing changes in configuration and formation of sharp interfaces and islands. (a) Reduction under H<sub>2</sub> of HfSe<sub>2</sub>. (b) Reduction under H<sub>2</sub> of ZrSe<sub>2</sub>.

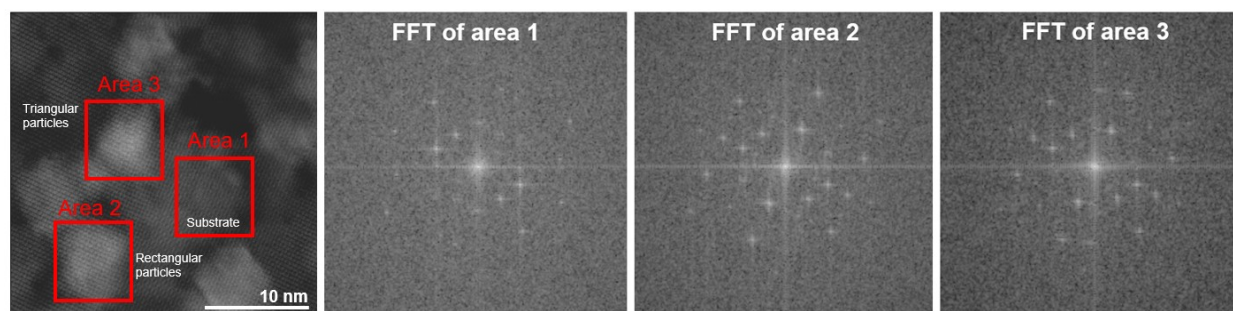

**Figure S11.** Analysis of HAADF-STEM image of  $\text{ZrSe}_2$  after reduction. FFT analysis of underlying flake (area 1) suggests epitaxy with the islands, either rectangular (area 2) or triangular (area 3).

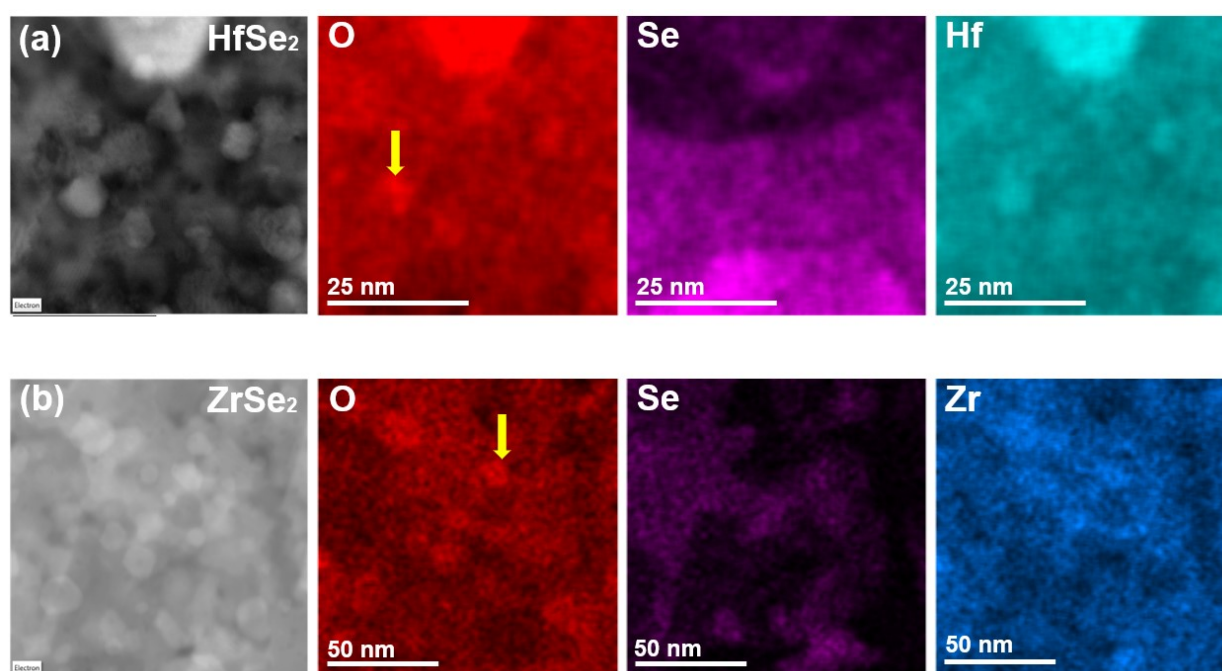

**Figure S12.** EDS analysis of  $\text{HfSe}_2$  and  $\text{ZrSe}_2$  flakes after exposure to  $\text{H}_2$  for 1 hour at  $1050\text{ }^\circ\text{C}$ . (a) HAADF-STEM image of  $\text{HfSe}_2$ , and corresponding EDS maps for O, Se, and Hf. The islands show a strong signal for Hf and O (yellow arrow), suggesting that Hf oxides form a substantial part of the structure. (b) HAADF-STEM image of  $\text{ZrSe}_2$ , and corresponding EDS maps for O, Se, and Zr. The islands show a strong signal for Zr and O (yellow arrow) similar to the result for  $\text{HfSe}_2$ .

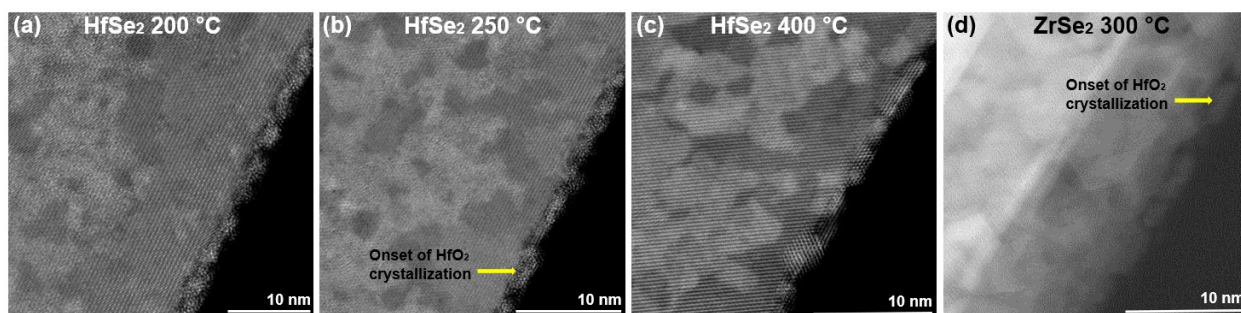

**Figure S13.** Annealing in H<sub>2</sub> shows the progressive crystallization of amorphous oxide detected in fresh samples. (a-c) Annealing of HfSe<sub>2</sub>, showing the transition of amorphous to a crystalline phase starting at 250 °C. (d) Annealing of ZrSe<sub>2</sub> causes crystallization at 300 °C.

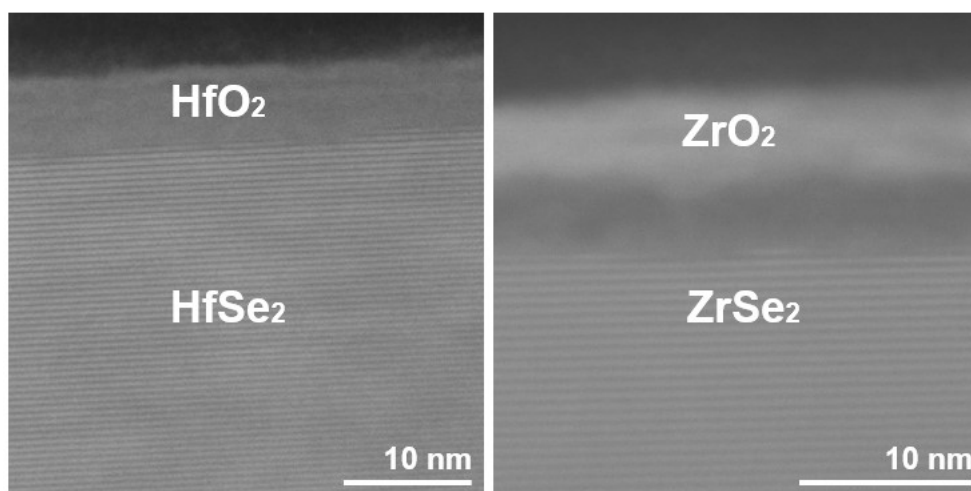

**Figure S14.** Additional images of the cross section of plasma-oxidized flakes. Some delamination can sometimes be observed, as seen by the small gap between the ZrO<sub>2</sub> layer and the ZrSe<sub>2</sub> structure.

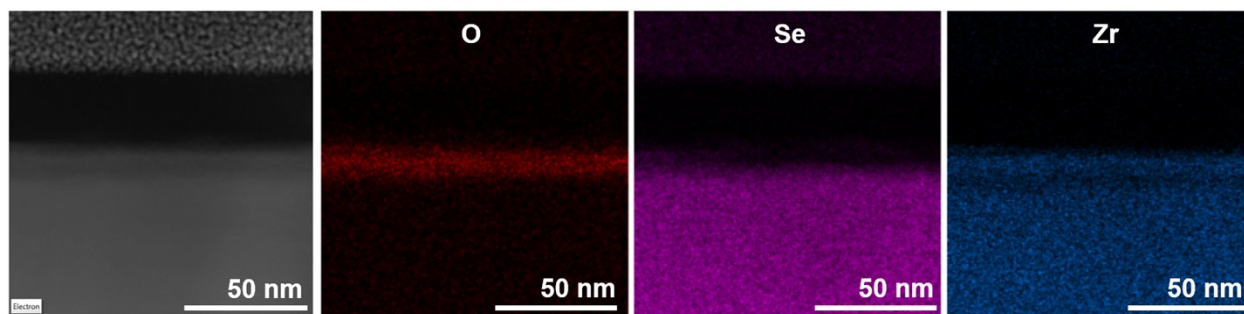

**Figure S15.** Cross sectional imaging of ZrSe<sub>2</sub> after plasma oxidation. The corresponding EDS maps show a uniform distribution of O, Se and Hf. Delamination of the ZrO<sub>2</sub> oxide layer can be seen on the EDS map of Zr.
